# Supplementary material for: Proline organocatalysis as a new tool for the asymmetric synthesis of ulosonic acid precursors
Source: Royal Society of Chemistry journal article supplement (doi:10.1039/b611265j), 2006-10-12
Supplement: b611265j.pdf [file b611265j.pdf]

# Proline Organocatalysis as a New Tool for the Asymmetric Synthesis of Ulosonic Acid Precursors

Dieter Enders\* and Tecla Gasperi

Article Ref : B611265J - Chemical Communications

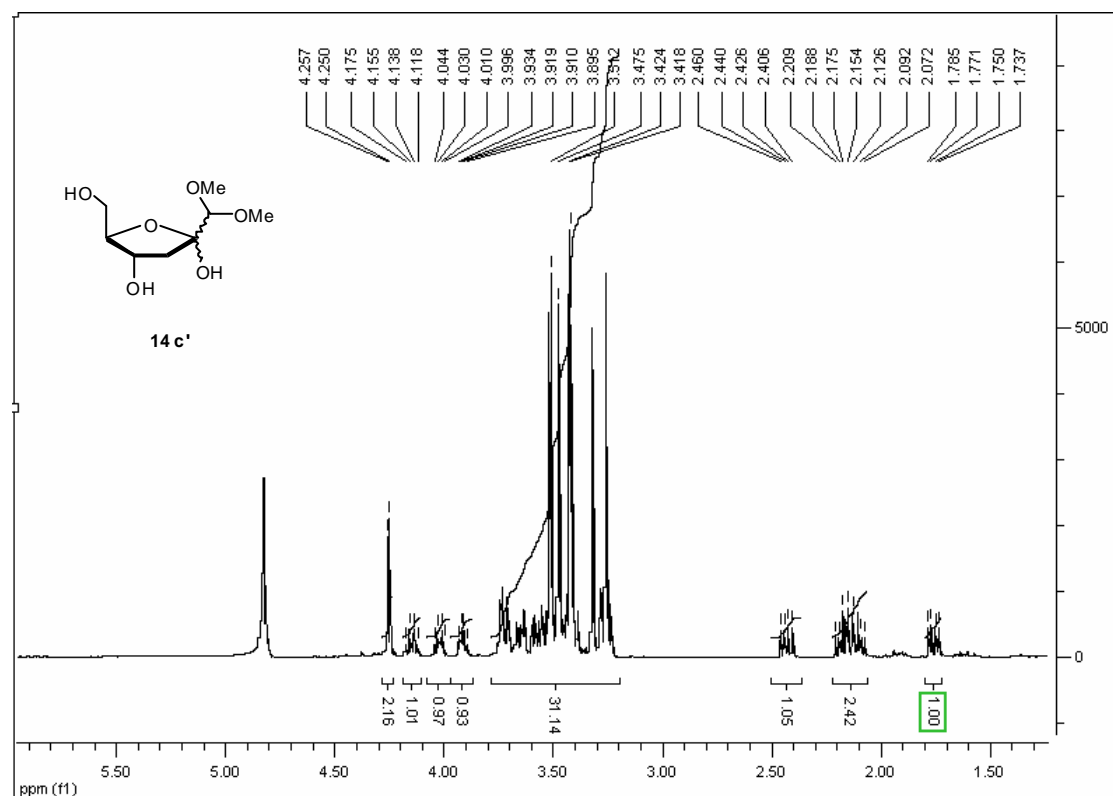

**14c'**: To a stirred solution of aldol product (*S,R*)-**8c** (248 mg, 1 mmol) in dry MeOH (10 mL) Amberlyst®-15 (496 mg) was added. After complete conversion (monitored by TLC, ~ 4 h) the acid ion-exchange resin was removed by filtration and the solvent was evaporated under vacuum. The hemiketal **14c'** was purified by flash chromatography (ethyl acetate/methanol, 65:5) affording a colourless sticky oil as mixture of  $\alpha$  and  $\beta$  furanose rings (185 mg, 89%).  $[\alpha]_D^{24} +23.4$  (c 0.97 in MeOH); Found C, 46.3, H 7.4. Calc. for  $C_8H_{16}O_6$ : C, 46.1, H, 7.7; IR ( $CHCl_3$ )  $\nu_{max}/cm^{-1}$  3422, 2938, 2837, 1646, 1454, 1195, 1086, 755;  $^1H$  NMR  $\delta_H$  (400 MHz,  $CD_3OD$ ) 1.76 (dd, 1H, CCHH,  $J$  5.4 Hz,  $J$  13.7 Hz), 2.10 (dd, 1H, CCHH,  $J$  7.8 Hz,  $J$  13.6 Hz), 2.18 (dd, 1H, CCHH,  $J$  8.4 Hz,  $J$  13.6 Hz), 2.43 (dd, 1H, CCHH,  $J$  8.0 Hz,  $J$  13.7 Hz), 3.4-3.7 (m, 11H,  $CH_2CHOH$ ,  $CH_2$ , OH), 3.41 (s, 3H,  $OCH_3$ ), 3.42 (s, 3H,  $OCH_3$ ), 3.47 (s, 3H,  $OCH_3$ ), 3.51 (s, 3H,  $OCH_3$ ), 3.91 (dt, 1H,  $CH_2CHOH$ ,  $J$  3.6 Hz,  $J$  5.4 Hz), 4.02 (dt, 1H,  $CHOH$ ,  $J$  5.4 Hz,  $J$  8.0 Hz), 4.16 (*pseudo* q, 1H,  $CHOH$ ,  $J$  8.1 Hz), 4.25 (s, 1H,  $CH(OCH_3)_2$ ), 4.26 (s, 1H,  $CH(OCH_3)_2$ );  $^{13}C$  NMR  $\delta_C$  (125 MHz;  $CD_3OD$ ) 39.1 ( $CH_2C$ ), 40.3 ( $CH_2C$ ), 56.6 (2 x  $CH_3$ ), 58.3 ( $CH_3$ ), 58.5 ( $CH_3$ ), 63.6 ( $CH_2OH$ ), 63.7 ( $CH_2OH$ ), 71.4 ( $CH_2CHOH$ ), 72.7 ( $CH_2CHOH$ ), 87.7 ( $CH_2CHO$ ), 88.0 ( $CH_2CHO$ ), 106.0 ( $CH(OCH_3)_2$ ), 106.9 ( $CH(OCH_3)_2$ ), 109.6 (C), 110.2 (C).  $m/z$  (ESI): 209 ( $M^+ + 1$ , 4), 191 ( $M^+ - 17$ , 24), 176 ( $M^+ - 32$ , 100), 158 ( $M^+ - 50$ , 40) 148 ( $M^+ - 60$ , 55).

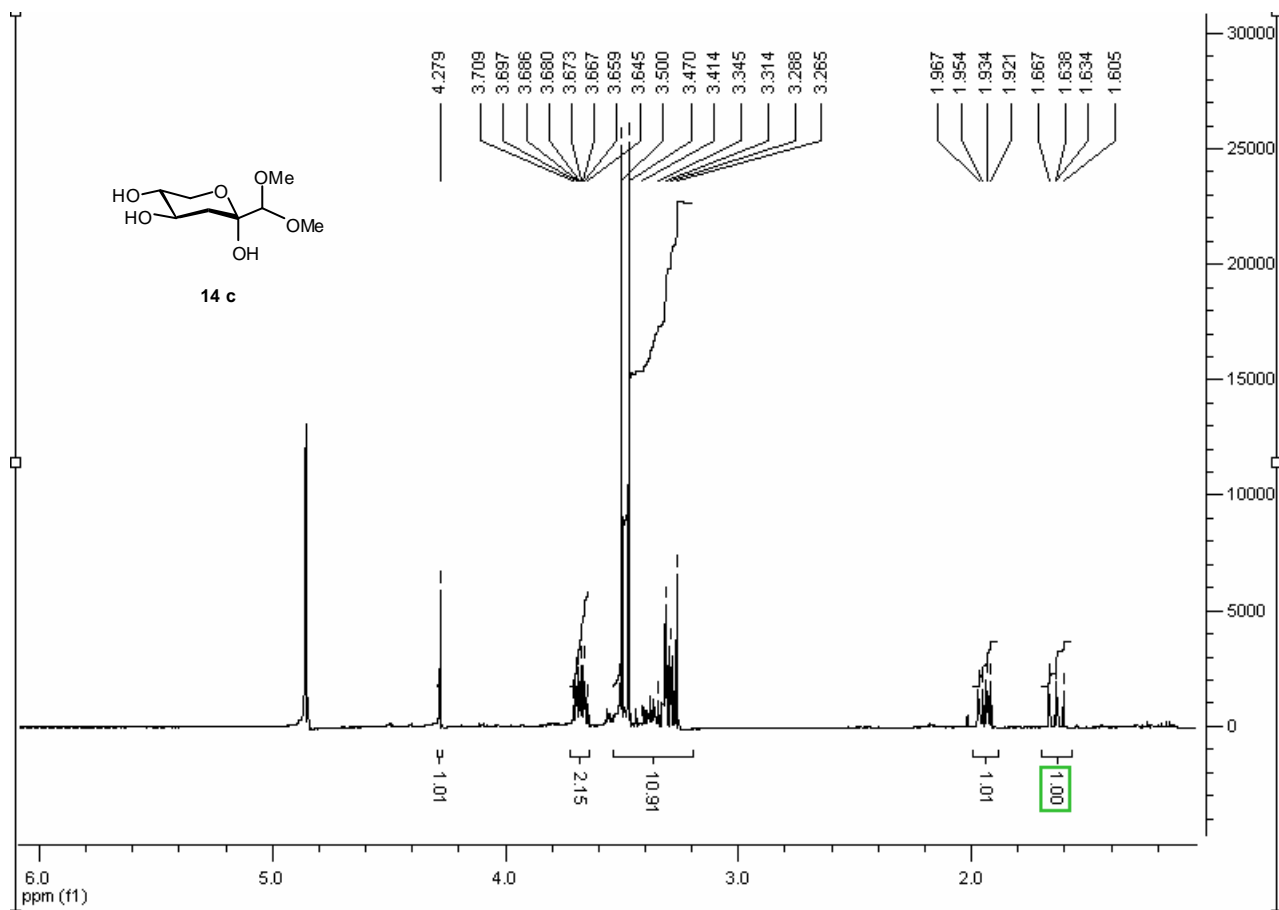

**14c**: To a stirred solution of aldol product (*R,R*)-**8c** (124 mg, 0.5 mmol) in dry MeOH (5 mL) Amberlyst®-15 (248 mg) was added. After complete conversion (monitored by TLC, ~3.5 h) the acid ion-exchange resin was removed by filtration and the solvent was evaporated under vacuum. The hemiketal **14c** was purified by flash chromatography (ethyl acetate/ methanol, 95:5) affording a colourless sticky oil as a single pyranose form (90 mg, 87%).  $[\alpha]_{\text{D}}^{24}$  -10.8 (c 1.01 in MeOH); Found C, 46.5, H 8.1. Calc. for  $\text{C}_8\text{H}_{16}\text{O}_6$ : C, 46.1, H, 7.7;  $^1\text{H}$  NMR  $\delta_{\text{H}}$  (400 MHz,  $\text{CD}_3\text{OD}+\text{D}_2\text{O}$ ) 1.61 (dd, 1H, CCHH,  $J$  11.6 Hz,  $J$  13.1 Hz), 1.92 (dd, 1H, CCHH,  $J$  5.3 Hz,  $J$  13.1 Hz), 3.23-3.52 (m, 5H,  $\text{OCH}_2$ ,  $\text{OCH}_2\text{CHOH}$ ,  $\text{CCH}_2\text{CHOH}$ ,  $\text{COH}$ ), 3.45 (s, 3H,  $\text{OCH}_3$ ), 3.48 (s, 3H,  $\text{OCH}_3$ ), 3.62-3.70 (m, 2H,  $\text{OCH}_2\text{CHOH}$ ,  $\text{CCH}_2\text{CHOH}$ ), 4.25 (s, 1H,  $\text{CH}(\text{OCH}_3)_2$ ),  $^{13}\text{C}$  NMR  $\delta_{\text{C}}$  (125 MHz;  $\text{CD}_3\text{OD}+\text{D}_2\text{O}$ ) 35.8 ( $\text{CH}_2\text{C}$ ), 56.8 ( $\text{OCH}_3$ ), 58.4 ( $\text{OCH}_3$ ), 64.6 ( $\text{CH}_2\text{O}$ ), 70.4 ( $\text{CHOH}$ ), 72.5 ( $\text{CHOH}$ ), 102.4 ( $\text{COH}$ ), 105.8 ( $\text{CH}(\text{OCH}_3)_2$ );  $m/z$  (EI): 208 ( $M^+$ , 0.1), 191 ( $M^+-17$ , 2), 158 ( $M^+-50$ , 18), 147 ( $M^+-61$ , 100), 96 ( $M^+-112$ , 43).
